# Supplementary material
Source: Springer Nature journal article supplement (https://www.springermedizin.de/resource/supplementary/12943_2013_1358_MOESM2_ESM.pdf/9552796)
Supplement: MOESM2 [file 9552796]

**A**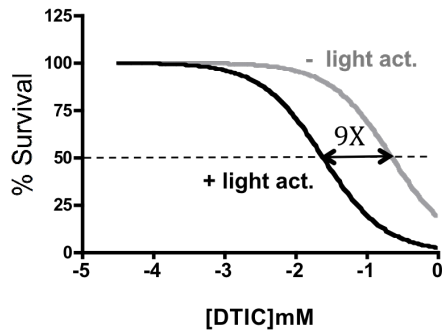**B**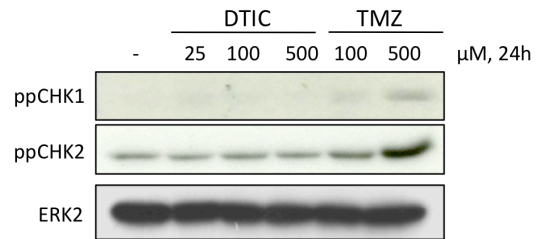**Supplementary Figure 1.**

**A, DTIC exposure to white light increases DTIC' inhibitory effect.** Dose response curve of WM266-4 cell survival to light activated (+ light act.) or non-activated (- light act.) DTIC. Untreated cells were set as 100%. Light exposure reduced the IC50 for DTIC 9-fold. **B, Light activated DTIC doesn't activate CHK-kinases.** A375P cells were treated for 24h with DTIC or TMZ as indicated. Cell lysates were prepared as described (Wellbrock et al., 2008) and analysed by standard Western-blotting protocols for the expression of active CHK1 and 2. Antibodies used were: anti-phosphoCHK1 (ser345), anti-phosphoCHK2 (Thr68) from Cell Signalling and, as a loading control, anti-ERK2 (C-14) from Santa Cruz Biotechnology, Santa Cruz, CA, USA.
